# Supplementary material for: Active Commuting to University Is Positively Associated with Physical Activity and Perceived Fitness
Source: MDPI journal article supplement (doi:10.3390/healthcare10060990), 2022-05-26
Supplement: s1 [file s1]

**Table S1.** Associations between mode of commuting with physical activity, sedentarism, and fitness of participants by gender.

|                                          | Mode of Commuting to University * |                              |                              |                              |
|------------------------------------------|-----------------------------------|------------------------------|------------------------------|------------------------------|
|                                          | Men                               |                              | Women                        |                              |
|                                          | Active                            | Public                       | Active                       | Public                       |
|                                          | OR<br>(95% CI)                    | OR<br>(95% CI)               | OR<br>(95% CI)               | OR<br>(95% CI)               |
| <b>Physical Activity and Sedentarism</b> |                                   |                              |                              |                              |
| <i>PA Levels</i>                         |                                   |                              |                              |                              |
| <i>Light</i>                             | Ref.                              | Ref.                         | Ref.                         | Ref.                         |
| <i>Moderate</i>                          | <b>3.206</b><br>(1.33, 7.69)      | <b>2.405</b><br>(1.04, 5.56) | 1.278<br>(0.63, 2.58)        | 0.973<br>(0.52, 1.73)        |
| <i>Vigorous</i>                          | <b>2.674</b><br>(1.18, 6.04)      | <b>2.583</b><br>(1.20, 5.53) | <b>2.729</b><br>(1.10, 6.74) | 2.020<br>(0.90, 4.51)        |
| <i>MVPA recommendations</i>              |                                   |                              |                              |                              |
| <i>Not meeting</i>                       | Ref.                              | Ref.                         | Ref.                         | Ref.                         |
| <i>Meeting</i>                           | <b>2.298</b><br>(1.16, 4.54)      | <b>2.071</b><br>(1.08, 3.96) | <b>2.073</b><br>(1.02, 4.18) | 1.580<br>(0.85, 2.93)        |
| <i>Total physical activity</i>           | 1.000<br>(0.99, 1.01)             | 1.000<br>(0.99, 1.00)        | <b>1.002</b><br>(1.00, 1.03) | 1.484<br>(0.98, 2.23)        |
| <i>Sedentary behaviour</i>               | 0.610<br>(0.32, 1.13)             | 0.746<br>(0.41, 1.33)        | <b>0.294</b><br>(0.15, 0.54) | <b>0.436</b><br>(0.25, 0.73) |
| <b>Fitness</b>                           |                                   |                              |                              |                              |
| <i>General Physical Condition</i>        | 1.174<br>(0.85, 1.62)             | 1.344<br>(0.98, 1.83)        | 0.817<br>(0.59, 1.12)        | 0.857<br>(0.65, 1.12)        |
| <i>Cardio-respiratory Fitness</i>        | 1.238<br>(0.92, 1.66)             | 1.320<br>(0.99, 1.75)        | 0.845<br>(0.63, 1.12)        | 0.899<br>(0.70, 1.15)        |
| <i>Muscular Strength</i>                 | <b>1.914</b><br>(1.36, 2.69)      | <b>1.777</b><br>(1.28, 2.46) | <b>1.391</b><br>(1.02, 1.88) | 1.287<br>(0.99, 1.66)        |
| <i>Speed and Agility</i>                 | 1.301<br>(0.94, 1.79)             | <b>1.417</b><br>(1.04, 1.92) | 1.136<br>(0.83, 1.55)        | 1.081<br>(0.82, 1.41)        |
| <i>Flexibility</i>                       | 1.172<br>(0.88, 1.55)             | 1.291<br>(0.98, 1.68)        | <b>1.331</b><br>(1.00, 1.75) | <b>1.346</b><br>(1.06, 1.70) |
| <i>General Health</i>                    | 1.312<br>(0.92, 1.86)             | <b>1.515</b><br>(1.08, 2.12) | 0.996<br>(0.71, 1.39)        | 1.223<br>(0.92, 1.62)        |

Analysis were adjusted for physical activity recommendations and Fitness self-reported (except in the analysis when that variable was the predictor variable). Notes: OR = Odd Ratio; 95% CI = 95% Confidence Intervals; Ref = reference; PA = Physical Activity; MVPA = Moderate to Vigorous Physical Activity; bold = Significant association with  $p < 0.05$ ; and \* = Private commuting was established as reference.

**Table S2.** Associations between PA recommendations and fitness by gender.

|                                   | PA Recommendations *                   |                                        |
|-----------------------------------|----------------------------------------|----------------------------------------|
|                                   | Men                                    | Women                                  |
|                                   | OR<br>(95% CI)                         | OR<br>(95% CI)                         |
| <b>Fitness</b>                    |                                        |                                        |
| <i>General physical condition</i> | <b>2.540 **</b><br><b>(2.06, 3.11)</b> | <b>2.103 **</b><br><b>(1.73, 2.54)</b> |
| <i>Cardio-respiratory fitness</i> | <b>1.996 **</b><br><b>(1.67, 2.38)</b> | <b>1.820 **</b><br><b>(1.53, 2.15)</b> |
| <i>Muscular strength</i>          | <b>2.230 **</b><br><b>(1.82, 2.72)</b> | <b>1.675 **</b><br><b>(1.40, 2.00)</b> |
| <i>Speed and agility</i>          | <b>2.030 **</b><br><b>(1.68, 2.44)</b> | <b>1.416 **</b><br><b>(1.18, 1.69)</b> |
| <i>Flexibility</i>                | <b>1.460 **</b><br><b>(1.24, 1.71)</b> | <b>1.385 **</b><br><b>(1.18, 1.62)</b> |
| <i>General health</i>             | <b>2.020 **</b><br><b>(1.65, 2.46)</b> | <b>1.495 **</b><br><b>(1.23, 1.80)</b> |

Notes: OR = Odd Ratio; 95% CI = 95% Confidence Intervals; PA = Physical Activity; MVPA = Moderate to Vigorous Physical Activity; bold = Significant association with  $p < 0.05$ ; \*\* =  $p < 0.001$ ; \* = not meeting MVPA was established as reference.
